# Supplementary material
Source: publisher figshare collection journal article supplement (https://sage.figshare.com/ndownloader/files/18743573)
Supplement: Supplementary file 1 [file 18743573]

## Sheet: Data
RESEARCH DATA
Title: A device for measuring sternal bone connectivity using vibration analysis techniques
Authors: Atte Joutsen, Juha Hautalahti, Esa Jaatinen, Sirkka Goebeler, Antti Paldanius, Jari Viik, Jari Laurikka, Jari Hyttinen
The below data are the integrated power in the 20 Hz - 2 kHz vibration band, The unit is [g^2]
	State	Measurement sweep #					Median	Min	Max
		1	2	3	4	5
Mockup	Intact	0.0705718	0.0868881	0.0864169	0.087347	0.0827452	0.0864169	0.0705718	0.087347
	Stable	0.0248684	0.0255319	0.0205941	0.00912022	0.00987323	0.0205941	0.00912022	0.0255319
	Unstable	0.00421638	0.00311746	0.00198399	0.00227637	0.00224136	0.00227637	0.00198399	0.00421638
Cadaver 1	Intact	0.00761117	0.00785097	0.00712371	0.00680992	0.00508878	0.00712371	0.00508878	0.00785097
	Stable	0.00711165	0.00468305	0.00519549	0.00518988	0.00536217	0.00519549	0.00468305	0.00711165
	Unstable	0.00294195	0.00285716	0.00196323	0.00175238	0.00146371	0.00196323	0.00146371	0.00294195
Cadaver 2	Intact	0.0269272	0.0199573	0.0181712	0.0178385	0.0169591	0.0181712	0.0169591	0.0269272
	Stable	0.00563317	0.00422677	0.00546785	0.00522112	0.0049812	0.00522112	0.00422677	0.00563317
	Unstable	0.000601194	0.000601105	0.000607001	0.000765675	0.000666418	0.000607001	0.000601105	0.000765675
